# Supplementary material for: DEXiAqua, a Model to Assess the Sustainability of Aquaculture Systems: Methodological Development and Application to a French Salmon Farm
Source: MDPI journal article supplement (doi:10.3390/su13147779), 2021-07-12
Supplement: s1 [file s1]

Archive with 7 entries (7 files):
- Supplementary_files_LE_FEON/English Proofreading Certificate-Le Féon.pdf
- Supplementary_files_LE_FEON/Supplementary_files_1.pdf
- Supplementary_files_LE_FEON/Supplementary_files_2.pdf
- Supplementary_files_LE_FEON/Supplementary_files_3.pdf
- Supplementary_files_LE_FEON/Supplementary_files_4.pdf
- Supplementary_files_LE_FEON/Supplementary_files_5.pdf
- Supplementary_files_LE_FEON/Supplementary_files_6.pdf
