# Supplementary material for: DEXiAqua, a Model to Assess the Sustainability of Aquaculture Systems: Methodological Development and Application to a French Salmon Farm
Source: MDPI journal article supplement (doi:10.3390/su13147779), 2021-07-12
Supplement: s1 [file s1 › Supplementary_files_LE_FEON/English Proofreading Certificate-Le Féon.pdf]

## Editor du Jour

### Certificate of English-Language Proofreading

This certificate confirms that the manuscript entitled **“DEXiAqua, a model to assess the sustainability of aquaculture systems: methodological development and application to a French salmon farm”** by Samuel Le Féon et al. was edited and proofread for correct English-language content by two native speakers of American English.

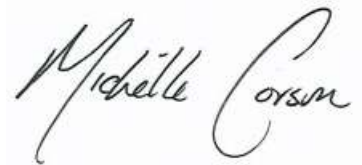

Michelle Corson

12 May 2021

Certificate no. 2021-40

Editor du Jour  
33 rue Émile Bernard  
35700 Rennes, FRANCE  
E-mail: [editordujour@yahoo.fr](mailto:editordujour@yahoo.fr)  
URL: <http://editordujour.corsondna.com/>
