# Supplementary material for: DEXiAqua, a Model to Assess the Sustainability of Aquaculture Systems: Methodological Development and Application to a French Salmon Farm
Source: MDPI journal article supplement (doi:10.3390/su13147779), 2021-07-12
Supplement: s1 [file s1 › Supplementary_files_LE_FEON/Supplementary_files_3.pdf]

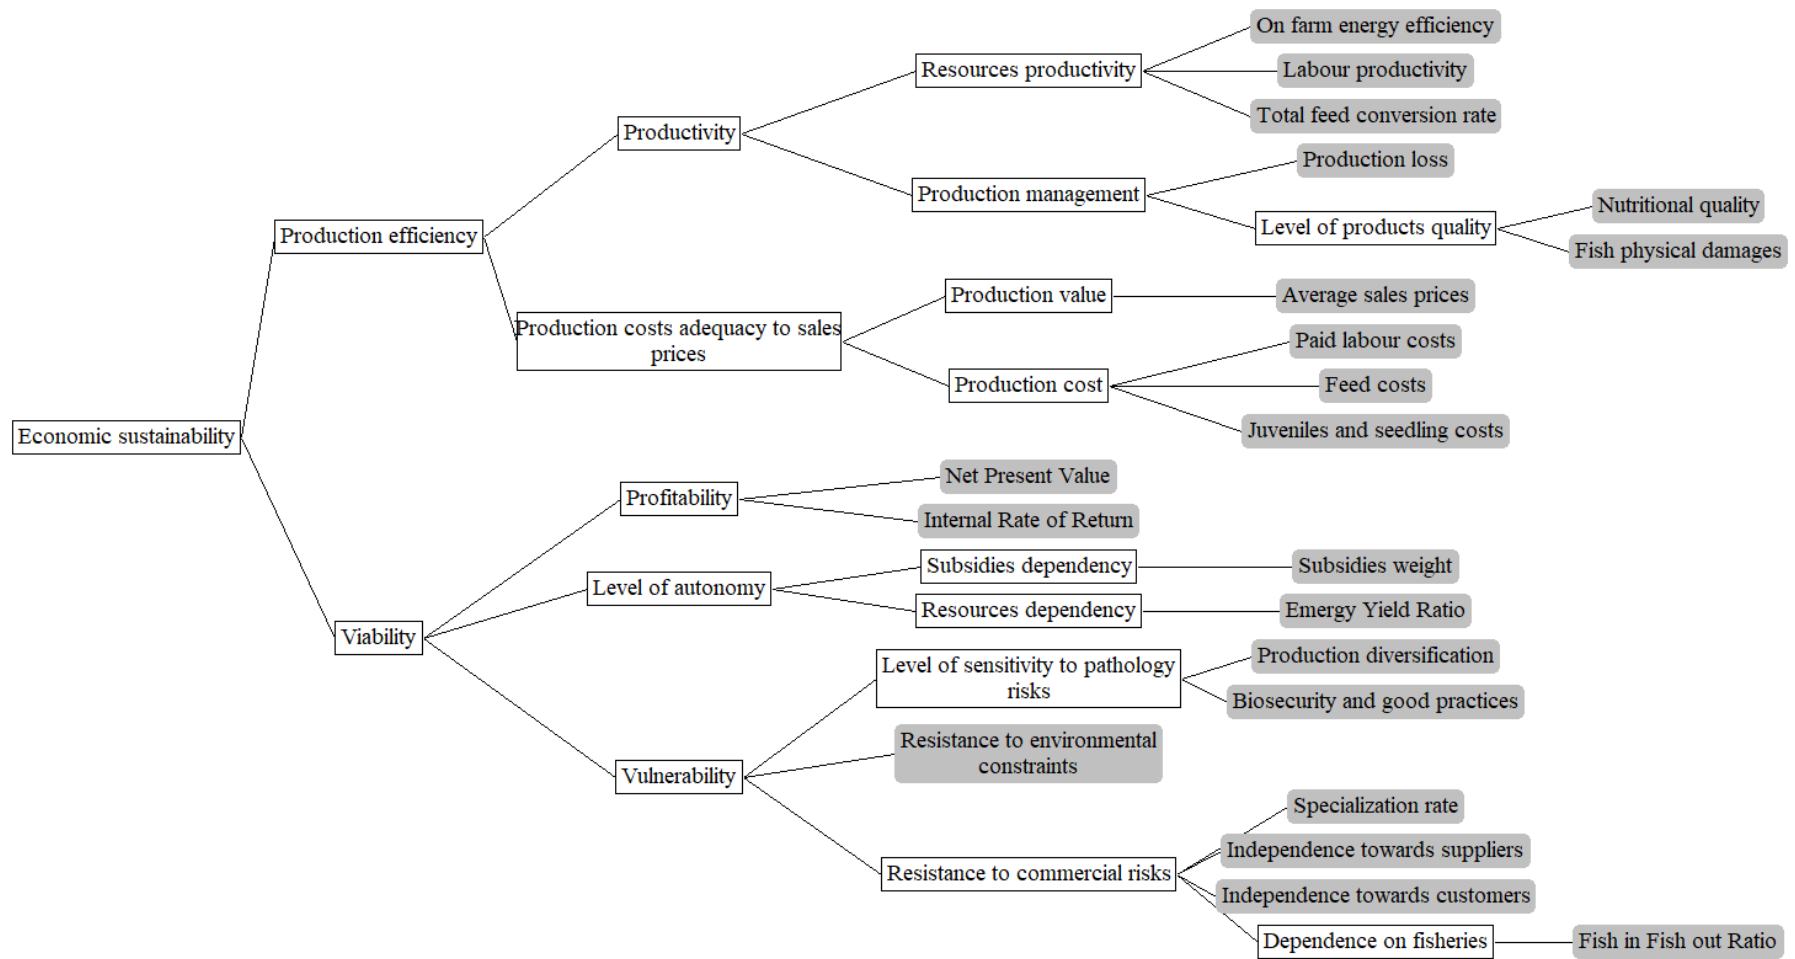

Figure 1: Synoptic view of the economy branch of the sustainability tree. Attributes are colored in white and indicators are colored in grey.

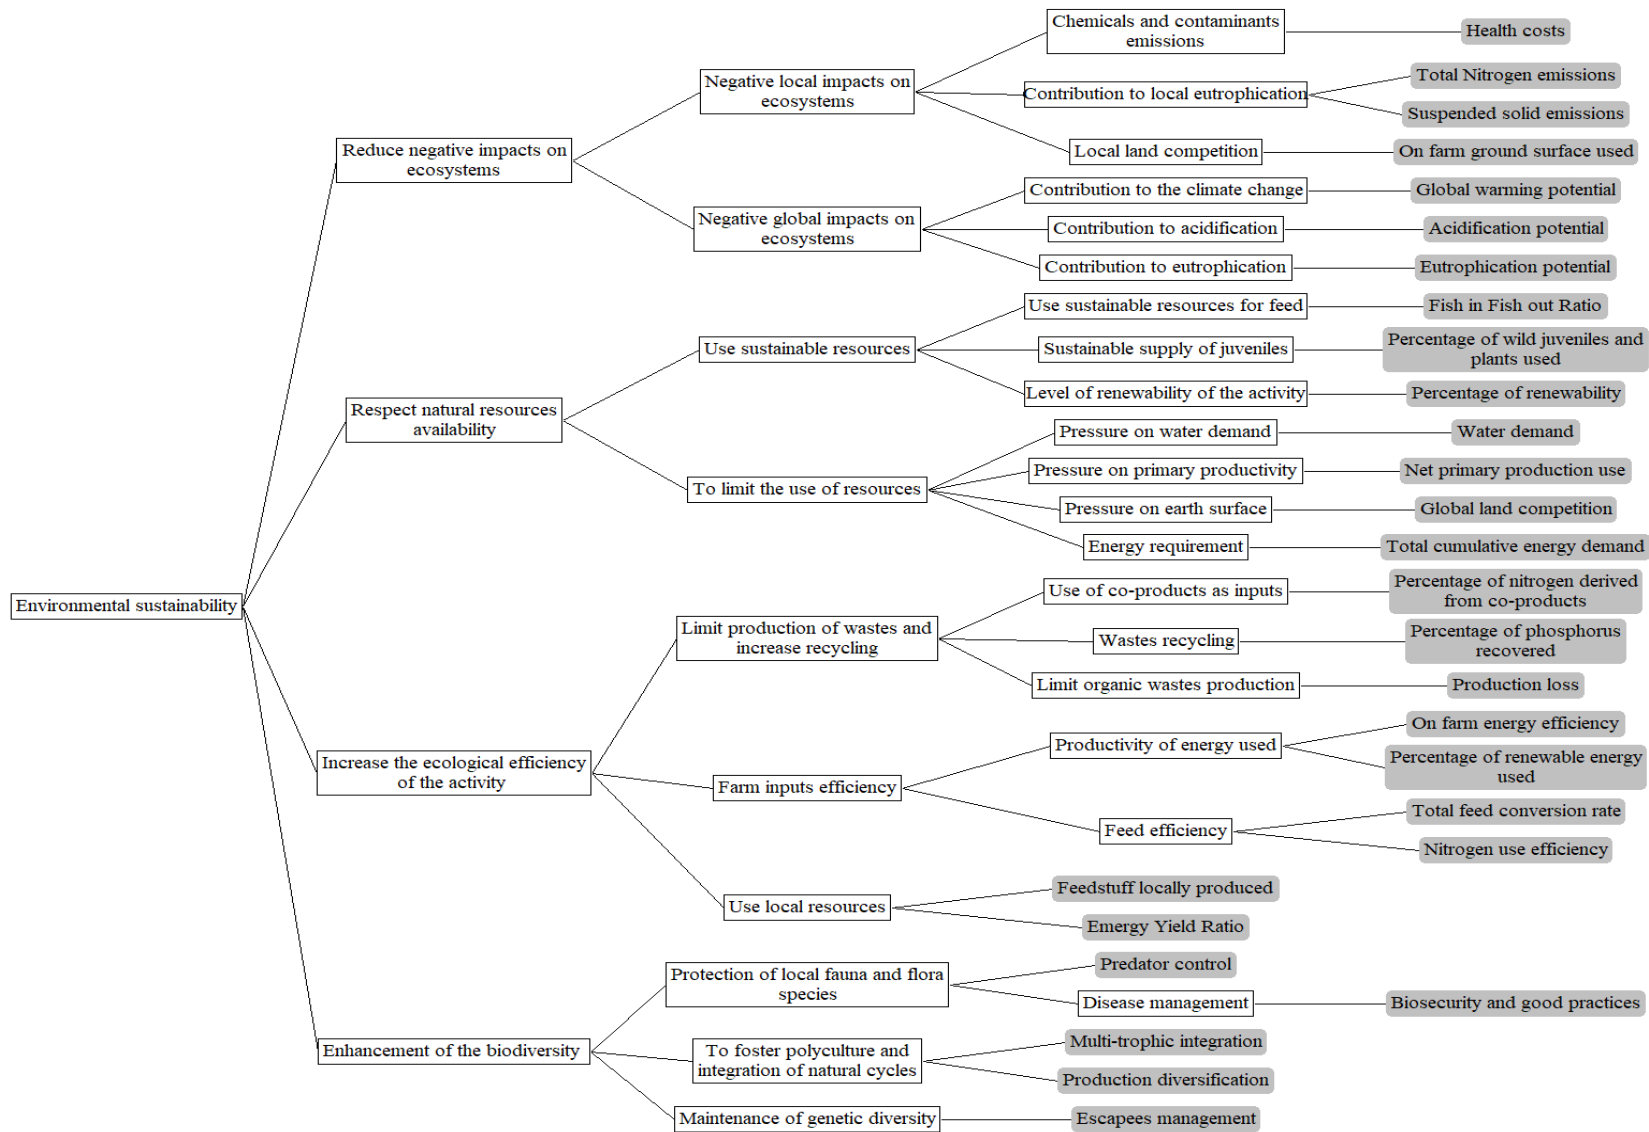

Figure 2: Synoptic view of the environment branch of the sustainability tree. Attributes are colored in white and indicators are colored in grey.

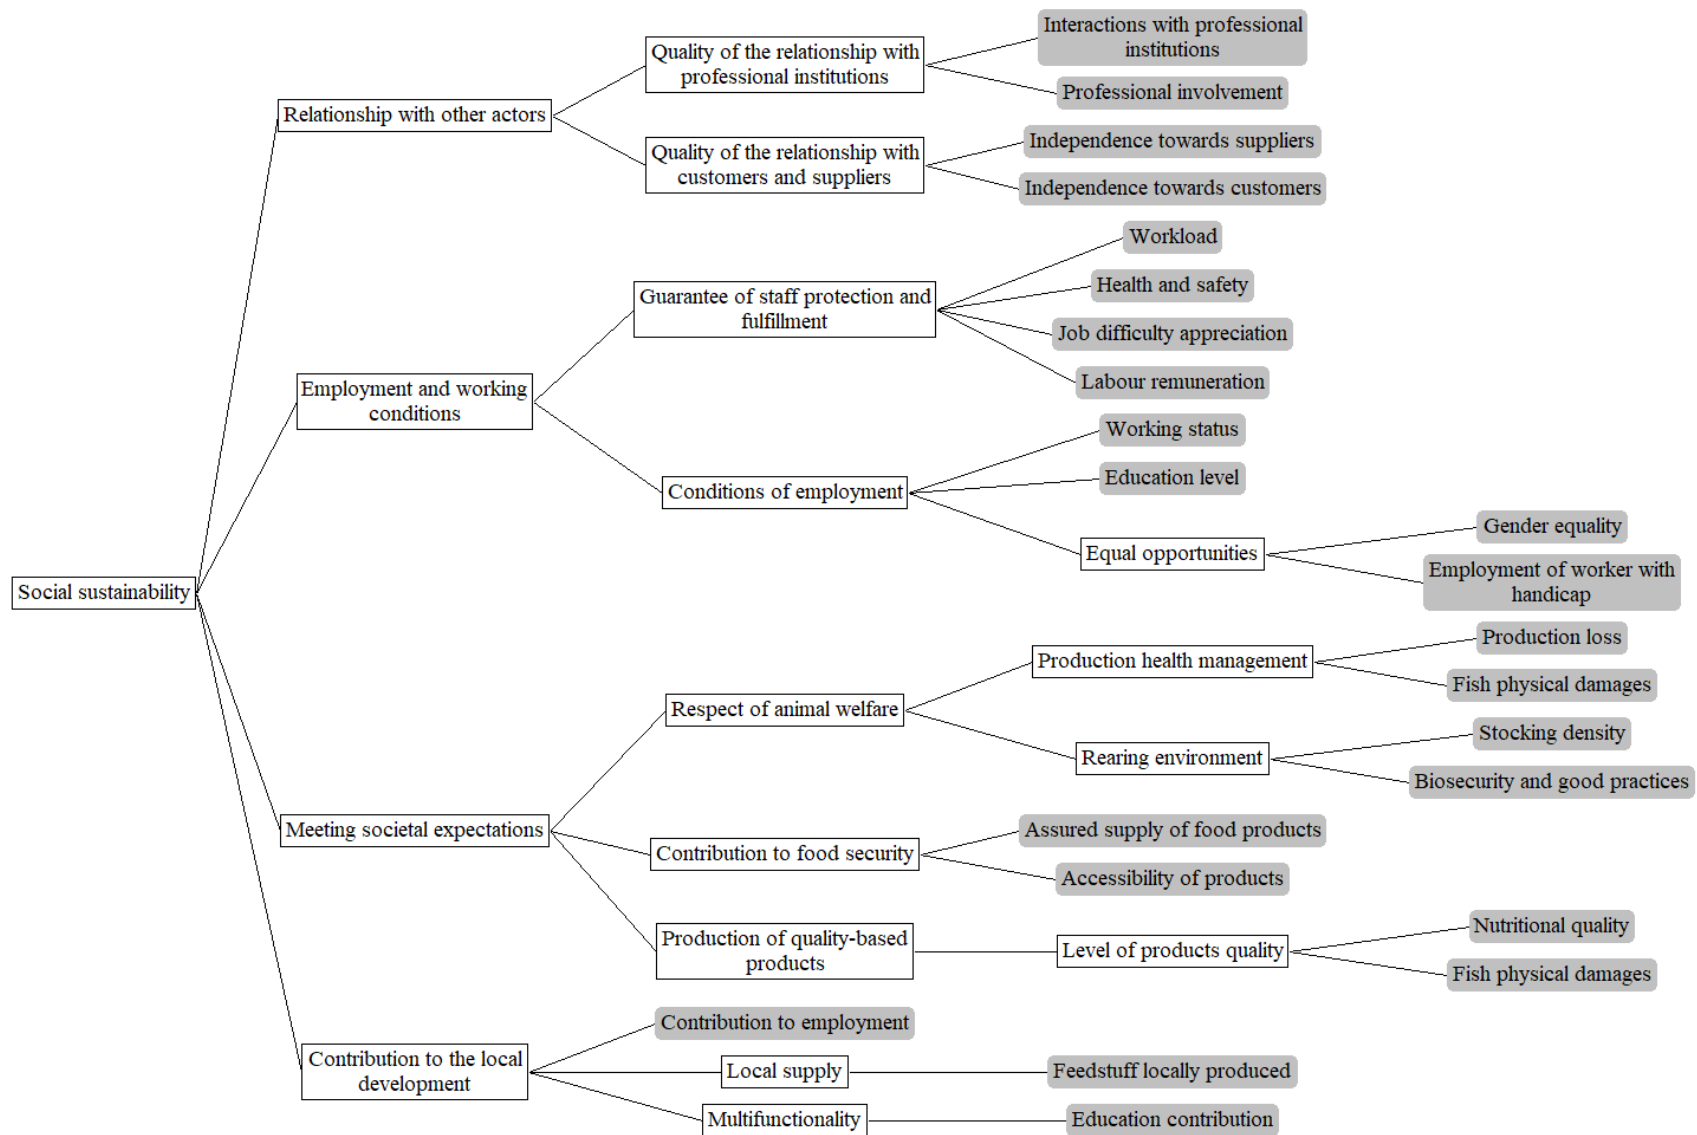

Figure 3: Synoptic view of the social branch of the sustainability tree. Attributes are colored in white and indicators are colored in grey.
