# Supplementary material for: DEXiAqua, a Model to Assess the Sustainability of Aquaculture Systems: Methodological Development and Application to a French Salmon Farm
Source: MDPI journal article supplement (doi:10.3390/su13147779), 2021-07-12
Supplement: s1 [file s1 › Supplementary_files_LE_FEON/Supplementary_files_4.pdf]

| Input data                                              | Unit                     | Value          |
|---------------------------------------------------------|--------------------------|----------------|
| Quantity of energy used                                 | MWh                      | 277,35         |
| Total biomass produced                                  | kg                       | 52000,0        |
| Total biomass harvested                                 | kg                       | 56000,0        |
| Quantity of feed used                                   | kg                       | 53200,0        |
| Quantity of biomass lost                                | kg                       | 406            |
| Dry matter biomass harvested                            | Tonne                    | 15,68          |
| Proportion of input self-produced                       | #                        | 0,00           |
| Number of planned species                               | #                        | 1              |
| Number of trophic levels                                | #                        | 1              |
| Fish In Fish Out Ratio                                  | #                        | 5,7            |
| Percentage of feed produced in the country              | %                        | 0,00           |
| On farm energy efficiency                               | MWh/t                    | 5,33           |
| Total feed conversion rate                              | kg/kg                    | 1,02           |
| Production loss                                         | %                        | 0,78%          |
| Total number of hours worked per year                   | h/year                   | 4000           |
| Monthly average salary of workers                       | €                        | 2500           |
| Monthly average salary of men                           | €                        | 2600           |
| Monthly average salary of women                         | €                        | 2300           |
| Monthly basic wages of the country                      | €                        | 1521           |
| Total number of temporary disability lost days per year | # days/year              | 3              |
| Number of permanent contract employees per year         | #                        | 2              |
| Number of qualified employees                           | #                        | 2              |
| Number of women workers                                 | #                        | 0              |
| Number of full time equivalent                          | #                        | 2              |
| Total number of employees per year                      | #                        | 2              |
| Employment of workers with handicap                     | Yes or No                | Yes            |
| Job difficulty appreciation                             | NU                       | Option 2       |
| Workload                                                | h/FTE/year               | 2000           |
| Accident severity rate                                  | # days lost / 1000 hours | 0,75           |
| Labour remuneration                                     | NU                       | 1,64           |
| Working status                                          | NU                       | 100,00%        |
| Education level                                         | NU                       | 100,00%        |
| Difference of salary between men and women              |                          | 1,13           |
| Employment of women                                     | %                        | 0,00%          |
| Gender equality                                         |                          | Option 3       |
| Average Yearly Discounted Gross Value Added             | €                        | 198 620,23 €   |
| Total feed costs (including fertilizers)                | €                        | 99 418,40 €    |
| Juveniles and seedlings costs                           | €                        | 5 250,00 €     |
| Costs of chemicals                                      | €                        | 10 000,00 €    |
| Income derived from the biggest customer                | €                        | 100 000,00 €   |
| Net Present Value                                       |                          | 4 546 362,09 € |
| Internal Rate of return                                 |                          | 87%            |
| Turnover (if available)                                 | €                        | 560 000,00 €   |
| Subsidies received per year                             | €                        | 0,00 €         |
| Gross sales estimation                                  | €                        | 560 000,00 €   |

|                                                                  |                       |              |
|------------------------------------------------------------------|-----------------------|--------------|
| Average sales price of products                                  | €/kg                  | 10,00 €      |
| Total costs of labour                                            | €                     | 60 000,00 €  |
| Main product turnover                                            | €                     | 560 000,00 € |
| Labour productivity                                              | #                     | 3,31         |
| Paid labour costs (compared to the biomass harvested)            | €/kg                  | 1,07 €       |
| Juveniles and seedling costs (compared to the biomass harvested) | €/kg                  | 0,09 €       |
| Subsidies weights (compared to the biomass harvested)            | €/kg                  | 0,00 €       |
| Rate of specialization                                           | %                     | 100%         |
| Independence towards customers                                   | %                     | 18%          |
| Feed costs (compared to the biomass harvested)                   | €/kg                  | 1,78 €       |
| Emergy Yield Ratio                                               | #                     | 1,07         |
| Percentage of renewability (%R)                                  | %                     | 10,66%       |
| Quantity of total nitrogen released                              | kg                    | 1181,6608    |
| Quantity of suspended solid released                             | kg                    | 3000         |
| On farm ground surface used                                      | m <sup>2</sup>        | 14160        |
| Percentage of wild juveniles and plants used                     | %                     | 0,00%        |
| Percentage of nitrogen derived from co-products                  | %                     | 0%           |
| Percentage of phosphorus recovered                               | %                     | 18,00%       |
| Percentage of renewable energy used                              | %                     | 0,00%        |
| Quantity of nitrogen used in feed input                          | kg                    | 2720,86      |
| Quantity of nitrogen in input biomass                            | kg                    | 118,4        |
| Quantity of nitrogen used in input                               | kg                    | 2839,26      |
| Quantity of nitrogen recovered in output biomass                 | kg                    | 1657,6       |
| Nitrogen use efficiency                                          | #                     | 58,38%       |
| Percentage of escapees per year                                  | %                     | 0,00%        |
| Resistance to environmental constraints                          | #                     | 11           |
| Water demand                                                     | m <sup>3</sup>        | 124          |
| Net primary production use                                       | kg C éq               | 32           |
| Global warming potential                                         | kg CO2 eq             | 3,137        |
| Acidification potential                                          | kg SO2 eq             | 12,8         |
| Eutrophication potential                                         | kg PO43- éq           | 34,3         |
| Global land competition                                          | m <sup>2</sup>        | 1000         |
| Total cumulative energy demand                                   | GJ                    | 105,8        |
| Biosecurity and good practices                                   | #                     | 4            |
| Nutritional quality                                              | g/100g                | 20,0         |
| Interactions with professional institutions                      |                       | Option 1     |
| Fish physical damage                                             | %                     | 10%          |
| Education contribution                                           | NU                    | Option 2     |
| Predator control                                                 |                       | Option 1     |
| Professional Involvement                                         | #                     | 3            |
| Fish stocking density                                            | kg/m3                 | 20           |
| Assured supply of food products                                  | ton of dry matter/FTE | 7,84         |
| Accessibility of products                                        | #                     | 6,57         |
| Contribution to employment                                       | FTE/100000€           | 0,36         |

|                                                  |                     |        |
|--------------------------------------------------|---------------------|--------|
| Health costs (compared to the biomass harvested) | €/kg                | 0,18   |
| Total nitrogen emissions by ton of biomass       | kg/ton              | 22,72  |
| Suspended solid emissions by ton of biomass      | kg/ton              | 57,69  |
| On farm ground surface used                      | m <sup>2</sup> /ton | 272,31 |
