# Supplementary material for: DEXiAqua, a Model to Assess the Sustainability of Aquaculture Systems: Methodological Development and Application to a French Salmon Farm
Source: MDPI journal article supplement (doi:10.3390/su13147779), 2021-07-12
Supplement: s1 [file s1 › Supplementary_files_LE_FEON/Supplementary_files_5.pdf]

| Indicators                   | Related criteria                                                                                                                                                               | Unit                  | Calculation | Scales                                         | Thresholds values proposed                                                                                                 | Threshold values                | Automatic scaling |
|------------------------------|--------------------------------------------------------------------------------------------------------------------------------------------------------------------------------|-----------------------|-------------|------------------------------------------------|----------------------------------------------------------------------------------------------------------------------------|---------------------------------|-------------------|
| On farm energy efficiency    | Environmental sustainability: Productivity of energy used<br>Economic sustainability: Resources productivity                                                                   | MWh/Ton               | 5,33        | Very High<br>High<br>Medium<br>Low<br>Very Low | Less than 0.5 MWh/T<br>Between 0.5 and 1 MWh/T<br>Between 1 and 1.5 MWh/T<br>Between 1.5 and 5 MWh/T<br>More than 5MWh/T   | 0,5<br>0,5<br>1<br>1,5<br>5     | Very Low          |
| Total feed conversion rate   | Economic sustainability: Resources productivity<br>Environmental sustainability: Feed efficiency                                                                               | kg/kg                 | 1,02        | Very High<br>High<br>Medium<br>Low<br>Very Low | More than 2.2<br>Between 1.8 and 2.2<br>Between 1.6 and 1.8<br>Between 1.3 and 1.6<br>Less than 1.3                        | 2,2<br>2,2<br>1,8<br>1,6<br>1,3 | Very Low          |
| Labour productivity          | Economic sustainability: Resources productivity                                                                                                                                | #                     | 3,3         | Very High<br>High<br>Medium<br>Low<br>Very Low | More than 2<br>Between 1.5 and 2<br>Between 1.25 and 1.5<br>Between 1 and 1.25<br>Less than 1                              | 2<br>2<br>1,5<br>1,25<br>1      | Very High         |
| Production loss              | Economic sustainability: Production management<br>Social sustainability: Production of quality-based products<br>Environmental sustainability: Limit organic wastes production | %                     | 0,8%        | Very High<br>High<br>Medium<br>Low<br>Very Low | More than 40%<br>Between 30 and 40%<br>Between 20 and 30%<br>Between 10 and 20%<br>Less than 10%                           | 0,4<br>0,4<br>0,3<br>0,2<br>0,1 | Very Low          |
| Nutritional quality          | Economic sustainability: Production management<br>Social sustainability: Production health management                                                                          | g [EPA +<br>DHA]/100g | 20          | Very High<br>High<br>Medium<br>Low<br>Very Low | More than 25g/100g<br>Between 20 and 25g/100g<br>Between 15 and 20g/100g<br>Between 10 and 15g/100g<br>Less than 10 g/100g | 25<br>25<br>20<br>15<br>10      | High              |
| Average sales prices         | Economic sustainability: Production cost adequacy to sales prices                                                                                                              | €/kg                  | 10          | Very High<br>High<br>Medium<br>Low<br>Very Low | More than 6.5€/kg<br>Between 5.5 and 6.5€/kg<br>Between 4.5 and 5.5€/kg<br>Between 4 and 4.5€/kg<br>Less than 4€/kg        | 6,5<br>6,5<br>5,5<br>4,5<br>4   | Very High         |
| Paid labour costs            | Economic sustainability: Production cost                                                                                                                                       | €/kg                  | 1,1         | Very High<br>High<br>Medium<br>Low<br>Very Low | More than 1€/kg<br>Between 0.8 and 1€/kg<br>Between 0.6 and 0.8<br>Between 0.4 and 0.6€/kg<br>Less than 0.4€/kg            | 1<br>1<br>0,8<br>0,6<br>0,4     | Very High         |
| Feed costs                   | Economic sustainability: Production cost                                                                                                                                       | €/kg                  | 1,8         | Very High<br>High<br>Medium<br>Low<br>Very Low | More than 2€/kg<br>Between 1.7 and 2€/kg<br>Between 1.5 and 1.7€/kg<br>Between 1.3 and 1.5€/kg<br>Less than 1.3€/kg        | 2<br>2<br>1,7<br>1,5<br>1,3     | High              |
| Juveniles and seedling costs | Economic sustainability: Production cost                                                                                                                                       | €/kg                  | 0,1         | Very High<br>High<br>Medium<br>Low<br>Very Low | More than 1.1€/kg<br>Between 0.9 and 1.1€/kg<br>Between 0.7 and 0.9€/kg<br>Between 0.5 and 0.7€/kg<br>Less than 0.5€/kg    | 1,1<br>1,1<br>0,9<br>0,7<br>0,5 | Very Low          |
| Net Present Value            | Economic sustainability: Profitability                                                                                                                                         | €                     | 4546362     | High<br>Medium<br>Low                          | > 0<br>= 0<br>< 0                                                                                                          | 0<br>0<br>0                     | High              |
| Internal Rate of Return      | Economic sustainability: Profitability                                                                                                                                         | €                     | 87%         | High<br>Medium<br>Low                          | > 6 %<br>= 6 %<br>< 6 %                                                                                                    | 6%<br>6%<br>6%                  | High              |
| Subsidies weight             | Economic sustainability: Economic dependency                                                                                                                                   | €/kg                  | 0           | High<br>Medium<br>Low                          | More than 0.42€/kg<br>Between 0.22 and 0.42€/kg<br>Less than 0.22€/kg                                                      | 0,42<br>0,42<br>0,22            | Low               |
| Energy Yield Ratio           | Environmental sustainability: Use local resources<br>Economic sustainability: Resources dependency                                                                             | #                     | 1,07        | High<br>Medium                                 | More than 2<br>Between 1,1 and 2                                                                                           | 2<br>2                          | Low               |

|                                               |                                                                                                                                                                                           |                          |          |           |                                     |          |        |
|-----------------------------------------------|-------------------------------------------------------------------------------------------------------------------------------------------------------------------------------------------|--------------------------|----------|-----------|-------------------------------------|----------|--------|
| Economic sustainability: Resources dependency |                                                                                                                                                                                           |                          |          | Low       | Less than 1,1                       | 1,1      |        |
| Production diversification                    | Economic sustainability: Level of sensitivity to pathology risks<br>Environmental sustainability: To foster polyculture and integration of natural cycles                                 | #                        | 1        | High      | More than 5 species                 | 5        | Low    |
|                                               |                                                                                                                                                                                           |                          |          | Medium    | Between 2 and 5 species             | 5        |        |
|                                               |                                                                                                                                                                                           |                          |          | Low       | 1 specie                            | 2        |        |
| Biosecurity and good practices                | Social sustainability: Respect of animal welfare<br>Economic sustainability: Level of sensitivity to pathology risks<br>Environmental sustainability: Protection of local fauna and flora | #                        | 4        | High      | More than 3                         | 4        | High   |
|                                               |                                                                                                                                                                                           |                          |          | Medium    | 2 or 3                              | 4        |        |
|                                               |                                                                                                                                                                                           |                          |          | Low       | 0 or 1                              | 2        |        |
| Resistance to environmental constraints       | Economic sustainability: Vulnerability                                                                                                                                                    | #                        | 11       | Very High | Less than 60%                       | 6        | High   |
|                                               |                                                                                                                                                                                           |                          |          | High      | Between 6 and 12                    | 12       |        |
|                                               |                                                                                                                                                                                           |                          |          | Medium    | Between 12 and 18                   | 18       |        |
|                                               |                                                                                                                                                                                           |                          |          | Low       | Between 18 and 24                   | 24       |        |
|                                               |                                                                                                                                                                                           |                          |          | Very Low  | More than 24                        | 24       |        |
| Specialization rate                           | Economic sustainability: Resistance to commercial risks                                                                                                                                   | %                        | 100,00%  | High      | More than 80%                       | 0,8      | High   |
|                                               |                                                                                                                                                                                           |                          |          | Medium    | Between 50 and 80%                  | 0,8      |        |
|                                               |                                                                                                                                                                                           |                          |          | Low       | Less than 50%                       | 0,5      |        |
| Independence towards suppliers                | Economic sustainability: Resistance to commercial risks<br>Social sustainability: Quality of the relationship with suppliers and customers                                                | #                        | 0        | High      | More than 50%                       | 0,5      | Low    |
|                                               |                                                                                                                                                                                           |                          |          | Medium    | Between 30% and 50%                 | 0,5      |        |
|                                               |                                                                                                                                                                                           |                          |          | Low       | Less than 30%                       | 0,3      |        |
| Independence towards customers                | Economic sustainability: Resistance to commercial risks<br>Social sustainability: Quality of the relationship with suppliers and customers                                                | %                        | 17,86%   | High      | Less than 25%                       | 0,25     | High   |
|                                               |                                                                                                                                                                                           |                          |          | Medium    | Between 25 % and 50%                | 0,5      |        |
|                                               |                                                                                                                                                                                           |                          |          | Low       | More than 50%                       | 0,5      |        |
| Fish in Fish out Ratio                        | Environmental sustainability: Use sustainable resources for feed<br>Economic sustainability: Resistance to commercial risks                                                               | #                        | 5,7      | Very High | More than 6                         | 6        | High   |
|                                               |                                                                                                                                                                                           |                          |          | High      | Between 4.5 and 6                   | 6        |        |
|                                               |                                                                                                                                                                                           |                          |          | Medium    | Between 3 and 4.5                   | 4,5      |        |
|                                               |                                                                                                                                                                                           |                          |          | Low       | Between 1.5 and 3                   | 3        |        |
|                                               |                                                                                                                                                                                           |                          |          | Very Low  | Less than 1.5                       | 1,5      |        |
| Interactions with professional institutions   | Social sustainability: Quality of the relationship with professional institutions                                                                                                         | NU                       | Option 1 | High      | More than one interactions with     | Option 3 | Low    |
|                                               |                                                                                                                                                                                           |                          |          | Medium    | More than one interactions with     | Option 2 |        |
|                                               |                                                                                                                                                                                           |                          |          | Low       | Only one interaction (or less) with | Option 1 |        |
| Professional involvement                      | Social sustainability: Quality of the relationship with professional institutions                                                                                                         | #                        | 3        | High      | More than 5                         | 5        | Medium |
|                                               |                                                                                                                                                                                           |                          |          | Medium    | Between 1 to 4                      | 5        |        |
|                                               |                                                                                                                                                                                           |                          |          | Low       | No participation                    | 1        |        |
| Workload                                      | Social sustainability: Guarantee of staff protection and fulfilment                                                                                                                       | h/FTE/year               | 2000     | High      | More than 2200h                     | 2200     | Medium |
|                                               |                                                                                                                                                                                           |                          |          | Medium    | Between 1600 and 2200h              | 2200     |        |
|                                               |                                                                                                                                                                                           |                          |          | Low       | Less than 1600h                     | 1600     |        |
| Health and safety                             | Social sustainability: Guarantee of staff protection and fulfilment                                                                                                                       | # days lost / 1000 hours | 0,75     | High      | More than 2                         | 2        | Low    |
|                                               |                                                                                                                                                                                           |                          |          | Medium    | Between 1 and 2                     | 2        |        |
|                                               |                                                                                                                                                                                           |                          |          | Low       | Less than 1                         | 1        |        |
| Job difficulty appreciation                   | Social sustainability: Guarantee of staff protection and fulfilment                                                                                                                       | NU                       | Option 2 | High      | The system is complex and requir    | Option 3 | Medium |
|                                               |                                                                                                                                                                                           |                          |          | Medium    | The system is quite complex but     | Option 2 |        |
|                                               |                                                                                                                                                                                           |                          |          | Low       | The system is not complex and ca    | Option 1 |        |
| Labour remuneration                           | Social sustainability: Guarantee of staff protection and fulfilment                                                                                                                       | NU                       | 1,64     | High      | More than 1.5                       | 1,5      | High   |
|                                               |                                                                                                                                                                                           |                          |          | Medium    | Between 1 and 1.5                   | 1,5      |        |
|                                               |                                                                                                                                                                                           |                          |          | Low       | Less than 1                         | 1        |        |
| Working status                                | Social sustainability: Conditions of employment                                                                                                                                           | NU                       | 100,00%  | High      | More than 80%                       | 0,8      | High   |
|                                               |                                                                                                                                                                                           |                          |          | Medium    | Between 60 and 80%                  | 0,8      |        |
|                                               |                                                                                                                                                                                           |                          |          | Low       | Less than 60%                       | 0,6      |        |
| Education level                               | Social sustainability: Conditions of employment                                                                                                                                           | NU                       | 100,00%  | High      | More than 30%                       | 0,3      | High   |
|                                               |                                                                                                                                                                                           |                          |          | Medium    | Between 10 and 30%                  | 0,3      |        |
|                                               |                                                                                                                                                                                           |                          |          | Low       | Less than 10%                       | 0,1      |        |
| Gender equality                               | Social sustainability: Conditions of employment                                                                                                                                           | NU                       | Option 3 | High      | More than 30% with no differenc     | Option 1 | Low    |
|                                               |                                                                                                                                                                                           |                          |          | Medium    | More than 30% with difference o     | Option 2 |        |
|                                               |                                                                                                                                                                                           |                          |          | Low       | Less than 30% or difference of sa   | Option 3 |        |
| Employment of worker with handicap            | Social sustainability: Conditions of employment                                                                                                                                           | NU                       | Yes      | Yes       |                                     |          | Yes    |
| Fish physical damages                         | Social sustainability: Respect animal welfare                                                                                                                                             | %                        | 10,00%   | High      | More than 20%                       | 0,2      | Medium |
|                                               |                                                                                                                                                                                           |                          |          | Medium    | Between 4% and 20%                  | 0,2      |        |

|                                              |                                                                                                                   |                       |             |           |                                     |          |          |
|----------------------------------------------|-------------------------------------------------------------------------------------------------------------------|-----------------------|-------------|-----------|-------------------------------------|----------|----------|
|                                              |                                                                                                                   |                       |             | Low       | Less than 4%                        | 0,04     |          |
| Stocking density                             | Social sustainability: Respect animal welfare                                                                     | %                     | 20          | High      | More than 45 kg/m³                  | 45       | Low      |
|                                              |                                                                                                                   |                       |             | Medium    | Between 22 and 45 kg/m³             | 45       |          |
|                                              |                                                                                                                   |                       |             | Low       | Less than 22kg/m³                   | 22       |          |
| Assured supply of food products              | Social sustainability: Contribution to food security                                                              | Ton of Dry Matter/FTE | 7,8         | Very High | More than 17,5 T/FTE                | 17,5     | Medium   |
|                                              |                                                                                                                   |                       |             | High      | Between 12,5 and 17,5 T/FTE         | 17,5     |          |
|                                              |                                                                                                                   |                       |             | Medium    | Between 7,5 and 12,5 T/FTE          | 12,5     |          |
|                                              |                                                                                                                   |                       |             | Low       | Between 2,5 and 7,5 T/FTE           | 7,5      |          |
|                                              |                                                                                                                   |                       |             | Very Low  | Less than 2,5 T/FTE                 | 2,5      |          |
| Accessibility of products                    | Social sustainability: Contribution to food security                                                              | #                     | 6,57        | Very High | Less than 4                         | 4        | Very Low |
|                                              |                                                                                                                   |                       |             | High      | Between 4 and 4.5                   | 4,5      |          |
|                                              |                                                                                                                   |                       |             | Medium    | Between 4.5 and 5.5                 | 5,5      |          |
|                                              |                                                                                                                   |                       |             | Low       | Between 5.5 and 6.5                 | 6,5      |          |
|                                              |                                                                                                                   |                       |             | Very Low  | More than 6.5                       | 6,5      |          |
| Contribution to employment                   | Social sustainability: Contribution to the local development                                                      | FTE/100000 €          | 0,36        | Very High | More than 1.2 FTE/100000€           | 1,2      | Very Low |
|                                              |                                                                                                                   |                       |             | High      | Between 0.9 and 1.2 FTE/100000      | 1,2      |          |
|                                              |                                                                                                                   |                       |             | Medium    | Between 0.7 and 0.9 FTE/100000      | 0,9      |          |
|                                              |                                                                                                                   |                       |             | Low       | Between 0.4 and 0.7 FTE/100000      | 0,7      |          |
|                                              |                                                                                                                   |                       |             | Very Low  | Less than 0.4 FTE/100000€           | 0,4      |          |
| Feedstuff locally produced                   | Environmental sustainability: Use local resources<br>Social sustainability: Contribution to the local development | %                     | 0,00%       | High      | More than 60%                       | 0,6      | Low      |
|                                              |                                                                                                                   |                       |             | Medium    | Between 40 and 60%                  | 0,6      |          |
|                                              |                                                                                                                   |                       |             | Low       | Less than 40%                       | 0,4      |          |
| Education contribution                       | Social sustainability: Contribution to the local development                                                      | NU                    | Option 2    | High      | At least one trainee hired and [at  | Option 1 | Medium   |
|                                              |                                                                                                                   |                       |             | Medium    | At least one trainee hired or at le | Option 2 |          |
|                                              |                                                                                                                   |                       |             | Low       | No trainee hired and no educatio    | Option 3 |          |
| Health costs                                 | Environmental sustainability: Negative local impact on ecosystems                                                 | €/kg                  | 0,18        | High      | More than 0.06€/kg                  | 0,06     | High     |
|                                              |                                                                                                                   |                       |             | Medium    | Between 0.04 and 0.06€/kg           | 0,04     |          |
|                                              |                                                                                                                   |                       |             | Low       | Less than 0.04€/kg                  | 0,04     |          |
| Total Nitrogen emissions                     | Environmental sustainability: Negative local impact on ecosystems                                                 | kg/Ton                | 22,72424615 | High      | More than 94kg/T                    | 94       | Low      |
|                                              |                                                                                                                   |                       |             | Medium    | Between 40 and 94 kg/T              | 94       |          |
|                                              |                                                                                                                   |                       |             | Low       | Less than 40 kg/T                   | 40       |          |
| Suspended solid emissions                    | Environmental sustainability: Negative local impact on ecosystems                                                 | kg/Ton                | 57,69       | High      | More than 405kg/T                   | 405      | Medium   |
|                                              |                                                                                                                   |                       |             | Medium    | Between 57 and 405 kg/T             | 405      |          |
|                                              |                                                                                                                   |                       |             | Low       | Less than 57 kg/T                   | 57       |          |
| On farm ground surface used                  | Environmental sustainability: Negative local impact on ecosystems                                                 | m²/Ton                | 272,31      | High      | More than 4 m²/T                    | 4        | High     |
|                                              |                                                                                                                   |                       |             | Medium    | Between 0.2 and 4 m²/T              | 4        |          |
|                                              |                                                                                                                   |                       |             | Low       | Less than 0.2m²/T                   | 0,2      |          |
| Global warming potential                     | Environmental sustainability: Negative global impact on ecosystems                                                | ton CO2 eq. / ton     | 3,14        | Very High | More than 8 T/T                     | 8        | Low      |
|                                              |                                                                                                                   |                       |             | High      | Between 6 and 8 T/T                 | 8        |          |
|                                              |                                                                                                                   |                       |             | Medium    | Between 4.5 and 6 T/T               | 6        |          |
|                                              |                                                                                                                   |                       |             | Low       | Between 2 and 4.5 T/T               | 4,5      |          |
|                                              |                                                                                                                   |                       |             | Very Low  | Less than 2T/T                      | 2        |          |
| Acidification potential                      | Environmental sustainability: Negative global impact on ecosystems                                                | kg SO2 eq. / Ton      | 12,8        | High      | More than 35kg/T                    | 35       | Low      |
|                                              |                                                                                                                   |                       |             | Medium    | Between 15 and 35kg/T               | 35       |          |
|                                              |                                                                                                                   |                       |             | Low       | Less than 15kg/T                    | 15       |          |
| Eutrophication potential                     | Environmental sustainability: Negative global impact on ecosystems                                                | kg PO43- eq/Ton       | 34,3        | High      | More than 70kg/T                    | 70       | Low      |
|                                              |                                                                                                                   |                       |             | Medium    | Between 35 and 70kg/T               | 70       |          |
|                                              |                                                                                                                   |                       |             | Low       | Less than 35kg/T                    | 35       |          |
| Percentage of renewability                   | Environmental sustainability: Use sustainable natural resources                                                   | %                     | 10,66%      | High      | More than 40%                       | 0,4      | Low      |
|                                              |                                                                                                                   |                       |             | Medium    | Between 20 and 40%                  | 0,4      |          |
|                                              |                                                                                                                   |                       |             | Low       | Less than 20%                       | 0,2      |          |
| Percentage of wild juveniles and plants used | Environmental sustainability: Use sustainable natural resources                                                   | %                     | 0,00%       | High      | More than 50%                       | 0,5      | Low      |
|                                              |                                                                                                                   |                       |             | Medium    | Between 10 and 50%                  | 0,5      |          |
|                                              |                                                                                                                   |                       |             | Low       | Less than 10%                       | 0,1      |          |
| Water demand                                 | Environmental sustainability: To limit the use of resources                                                       | m³/kg                 | 124         | High      | More than 125m³/kg                  | 125      | Medium   |
|                                              |                                                                                                                   |                       |             | Medium    | Between 10 and 125 m³/kg            | 125      |          |
|                                              |                                                                                                                   |                       |             | Low       | Between 1 and 10 m³/kg              | 10       |          |

|                                                 |                                                                                       |            |          |                |                                                                       |                      |                |
|-------------------------------------------------|---------------------------------------------------------------------------------------|------------|----------|----------------|-----------------------------------------------------------------------|----------------------|----------------|
|                                                 |                                                                                       |            |          | Very Low       | Less than 1m³/kg                                                      | 1                    |                |
| Net primary production use                      | Environmental sustainability: To limit the use of resources                           | kg C eq/kg | 32       | High           | More than 85kg/kg                                                     | 85                   | Medium         |
|                                                 |                                                                                       |            |          | Medium         | Between 15 and 85 kg/kg                                               | 85                   |                |
|                                                 |                                                                                       |            |          | Low            | Less than 15kg/kg                                                     | 15                   |                |
| Global land competition                         | Environmental sustainability: To limit the use of resources                           | m²/Ton     | 1000     | Very High      | More than 5500m²/T                                                    | 5500                 | Low            |
|                                                 |                                                                                       |            |          | High           | Between 2500 and 5500 m²/T                                            | 5500                 |                |
|                                                 |                                                                                       |            |          | Medium         | Between 1500 and 2500 m²/T                                            | 2500                 |                |
|                                                 |                                                                                       |            |          | Low            | Between 800 and 1500m²/T                                              | 1500                 |                |
|                                                 |                                                                                       |            |          | Very Low       | Less than 800m²/T                                                     | 800                  |                |
| Total cumulative energy demand                  | Environmental sustainability: To limit the use of resources                           | GJ/Ton     | 105,8    | Very High      | More than 110GJ/T                                                     | 110                  | High           |
|                                                 |                                                                                       |            |          | High           | Between 70 and 110 GJ/T                                               | 110                  |                |
|                                                 |                                                                                       |            |          | Medium         | Between 45 and 70 GJ/T                                                | 70                   |                |
|                                                 |                                                                                       |            |          | Low            | Between 30 and 45 GJ/T                                                | 45                   |                |
|                                                 |                                                                                       |            |          | Very Low       | Less than 30GJ/T                                                      | 30                   |                |
| Percentage of nitrogen derived from co-products | Environmental sustainability: Limit production wastes and increase recycling          | %          | 0,0%     | High           | More than 50%                                                         | 0,5                  | Low            |
|                                                 |                                                                                       |            |          | Medium         | Between 20 and 50%                                                    | 0,5                  |                |
|                                                 |                                                                                       |            |          | Low            | Less than 20%                                                         | 0,2                  |                |
| Percentage of phosphorus recovered              | Environmental sustainability: Limit production wastes and increase recycling          | %          | 18,00%   | High           | More than 30%                                                         | 0,3                  | Medium         |
|                                                 |                                                                                       |            |          | Medium         | Between 10 and 30%                                                    | 0,3                  |                |
|                                                 |                                                                                       |            |          | Low            | Less than 10%                                                         | 0,1                  |                |
| Percentage of renewable energy used             | Environmental sustainability: To limit the use of resources                           | %          | 0,00%    | High           | More than 50%                                                         | 0,5                  | Low            |
|                                                 |                                                                                       |            |          | Medium         | Between 20% to 50%                                                    | 0,5                  |                |
|                                                 |                                                                                       |            |          | Low            | Less than 20%                                                         | 0,2                  |                |
| Nitrogen use efficiency                         | Environmental sustainability: Feed efficiency                                         | %          | 58,38%   | High           | More than 30%                                                         | 0,3                  | High           |
|                                                 |                                                                                       |            |          | Medium         | Between 15 and 30%                                                    | 0,3                  |                |
|                                                 |                                                                                       |            |          | Low            | Less than 15%                                                         | 0,15                 |                |
| Predator control                                | Environmental sustainability: Protection of local fauna and flora species             | NU         | Option 1 | Not acceptable | Use of lethal predator control (or Non-use of lethal predator control | Option 1<br>Option 2 | Not acceptable |
| Multi-trophic integration                       | Environmental sustainability: To foster polyculture and integration of natural cycles | #          | 1        | High           | 3 trophic levels or more                                              | 3                    | Low            |
|                                                 |                                                                                       |            |          | Medium         | 2 trophic levels                                                      | 3                    |                |
|                                                 |                                                                                       |            |          | Low            | 1 trophic level                                                       | 2                    |                |
| Escapees management                             | Environmental sustainability: Maintenance of genetic diversity                        | %          | 0,00%    | High           | More than 4%                                                          | 0,04                 | Low            |
|                                                 |                                                                                       |            |          | Medium         | Between 0.5% and 4%                                                   | 0,04                 |                |
|                                                 |                                                                                       |            |          | Low            | Less than 0.5%                                                        | 0,005                |                |
