# Supplementary material for: DEXiAqua, a Model to Assess the Sustainability of Aquaculture Systems: Methodological Development and Application to a French Salmon Farm
Source: MDPI journal article supplement (doi:10.3390/su13147779), 2021-07-12
Supplement: s1 [file s1 › Supplementary_files_LE_FEON/Supplementary_files_6.pdf]

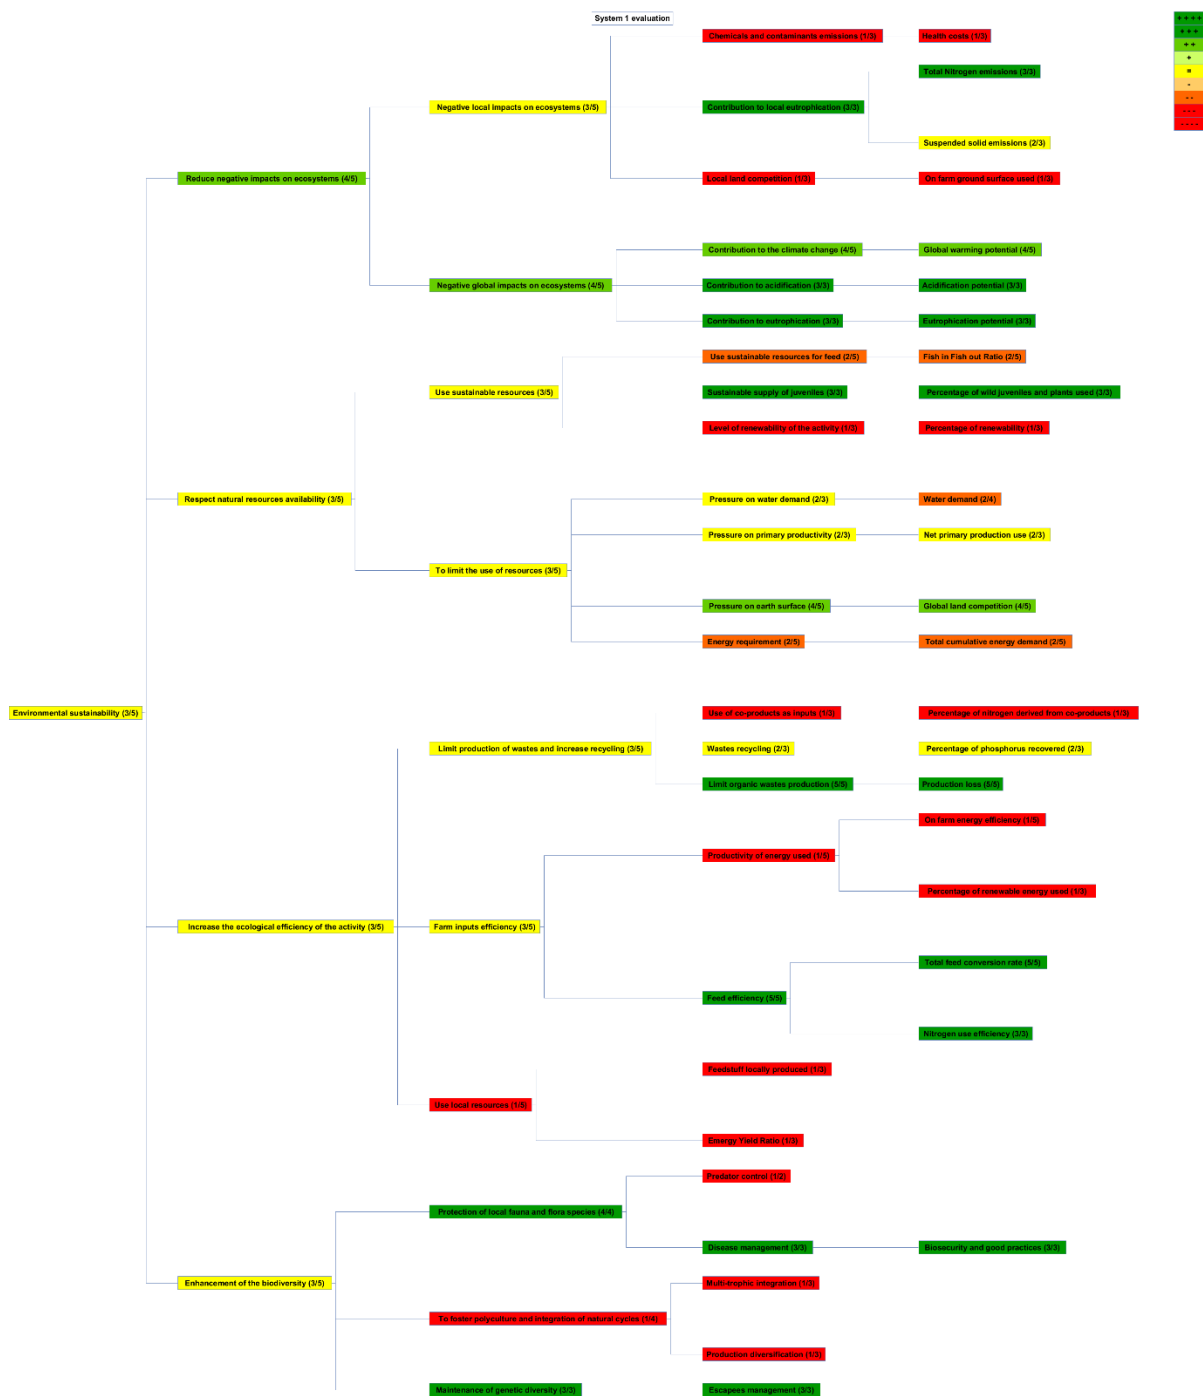

Figure 1: synoptic graph for environmental sustainability

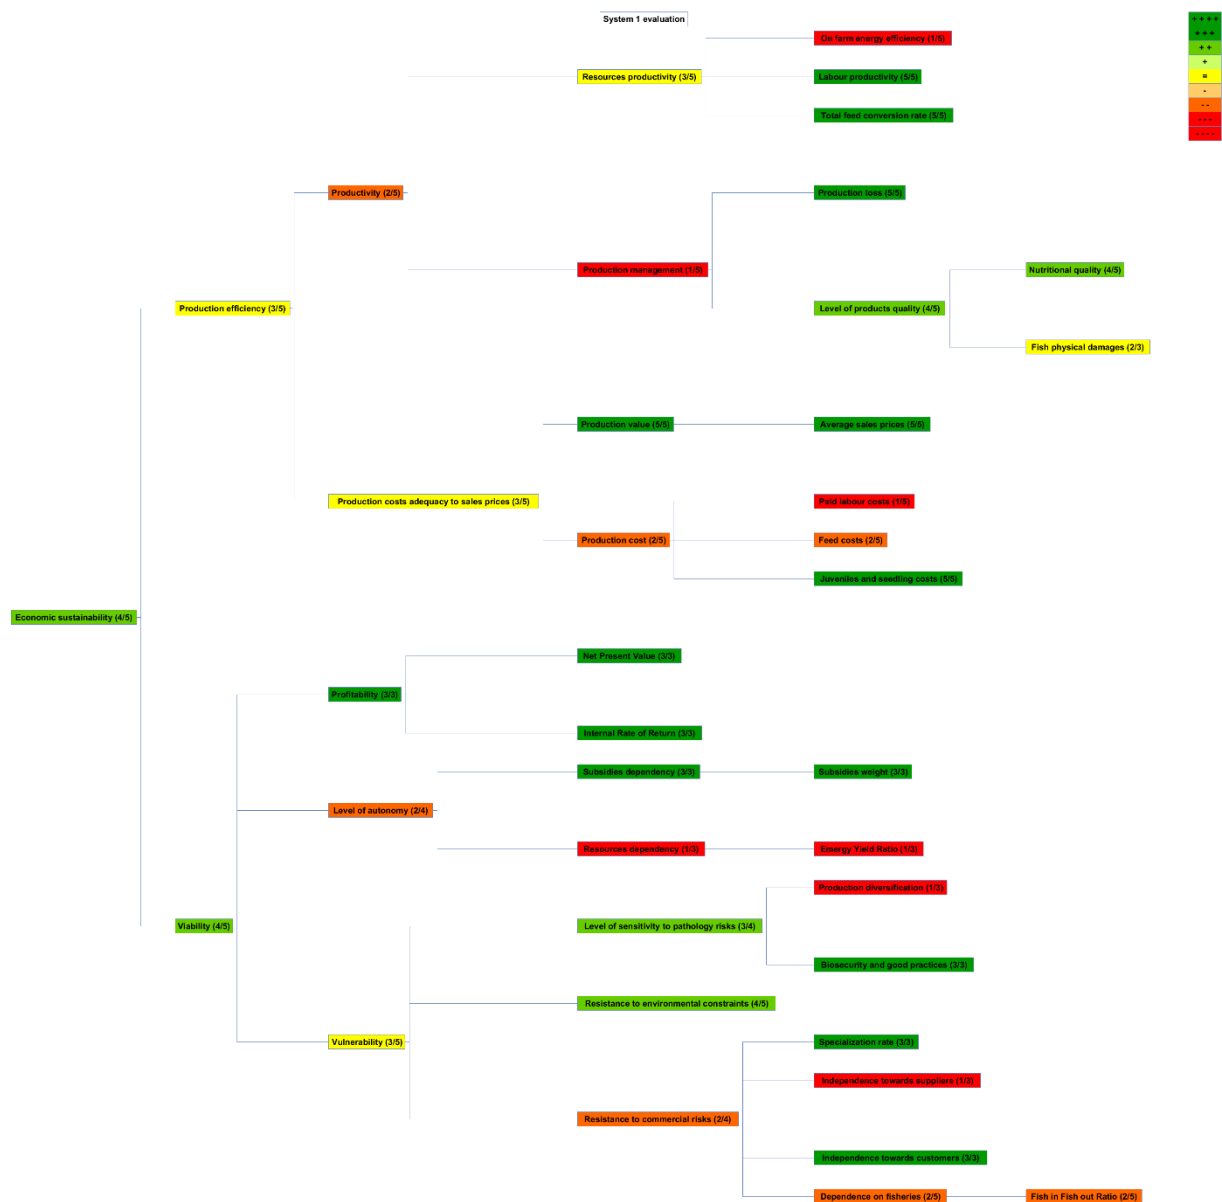

Figure 2: synoptic graph for economic sustainability

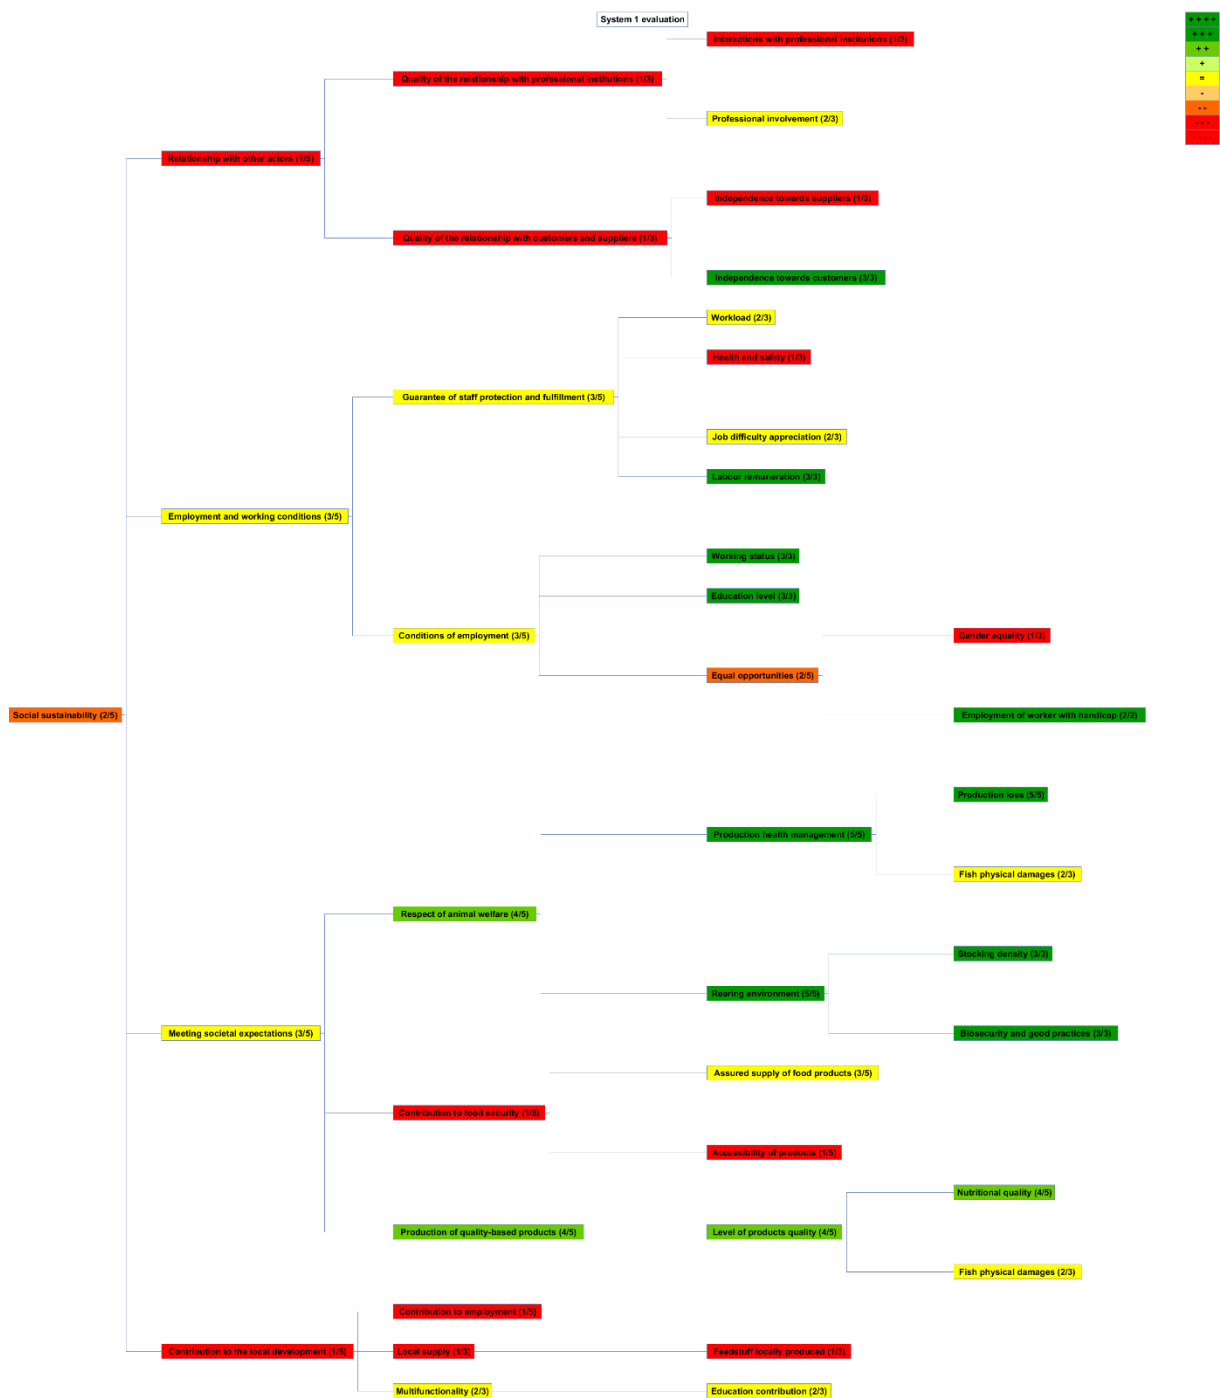

Figure 3: synoptic graph for social sustainability
